# Supplementary figures and images for: Landscape of Hopx expression in cells of the immune system
Source: PubMed Central journal article supplement — Heliyon. 2021 Nov 2;7(11):e08311. doi: 10.1016/j.heliyon.2021.e08311 (PMC8590040; doi:10.1016/j.heliyon.2021.e08311), 2021-11-02

**A**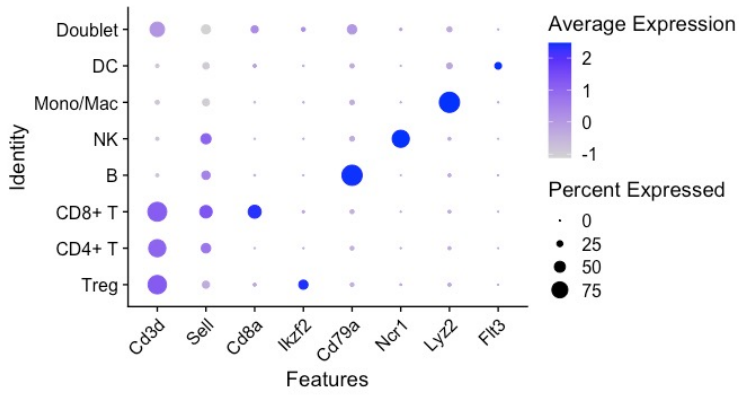

Supplement: mmc1.pdf [file mmc1.pdf]
